# Supplementary material for: Aniquinazolines A–D, Four New Quinazolinone Alkaloids from Marine-Derived Endophytic Fungus Aspergillus nidulans
Source: MDPI journal article supplement (doi:10.3390/md11072682), 2013-07-23
Supplement: s2 [file s2]

marinedrugs-11-02682-s001.mol
  corina  04141406483D 1   1.00000     0.00000 
CORINA 3.49 0023  12.04.2013
 36 42  0  0  0  0  0  0  0  0999 V2000
   -0.0166    1.3761    0.0096 C   0  0  0  0  0  0  0  0  0  0  0  0
    0.0021   -0.0041    0.0020 C   0  0  0  0  0  0  0  0  0  0  0  0
    1.1882   -0.7224   -0.0213 C   0  0  0  0  0  0  0  0  0  0  0  0
    2.3711    0.0126   -0.0353 C   0  0  0  0  0  0  0  0  0  0  0  0
    2.3413    1.4125   -0.0109 C   0  0  0  0  0  0  0  0  0  0  0  0
    1.1596    2.1195    0.0024 C   0  0  0  0  0  0  0  0  0  0  0  0
    4.5178   -1.4129   -0.4875 C   0  0  0  0  0  0  0  0  0  0  0  0
    5.9351   -1.0084   -0.1377 C   0  0  0  0  0  0  0  0  0  0  0  0
    5.8564    0.4679    0.0387 N   0  0  0  0  0  0  0  0  0  0  0  0
    4.4915    0.6516    0.5399 C   0  0  0  0  0  0  0  0  0  0  0  0
    3.6894   -0.4295   -0.0892 N   0  0  0  0  0  0  0  0  0  0  0  0
    4.1883   -2.4456   -1.0318 O   0  0  0  0  0  0  0  0  0  0  0  0
    6.3817   -1.6817    1.1598 C   0  0  0  0  0  0  0  0  0  0  0  0
    4.4482    0.5941    1.6304 H   0  0  0  0  0  0  0  0  0  0  0  0
    3.7809    1.9126    0.0225 C   0  0  0  0  0  0  0  0  0  0  0  0
    3.8430    2.9634    0.9598 O   0  0  0  0  0  0  0  0  0  0  0  0
    4.9888    3.7758    1.0980 C   0  0  0  0  0  0  0  0  0  0  0  0
    5.0669    4.3584    2.5149 C   0  0  0  0  0  0  0  0  0  0  0  0
    4.9250    4.9049    0.0860 C   0  0  0  0  0  0  0  0  0  0  0  0
    5.0842    4.5505   -1.2270 N   0  0  0  0  0  0  0  0  0  0  0  0
    4.9739    5.4652   -2.2088 C   0  0  0  0  0  0  0  0  0  0  0  0
    4.8228    6.8718   -1.8013 C   0  0  0  0  0  0  0  0  0  0  0  0
    4.7081    7.1528   -0.4222 C   0  0  0  0  0  0  0  0  0  0  0  0
    4.7416    6.1284    0.4672 N   0  0  0  0  0  0  0  0  0  0  0  0
    4.8032    7.9100   -2.7297 C   0  0  0  0  0  0  0  0  0  0  0  0
    4.6755    9.2100   -2.2916 C   0  0  0  0  0  0  0  0  0  0  0  0
    4.5623    9.4902   -0.9360 C   0  0  0  0  0  0  0  0  0  0  0  0
    4.5744    8.4779   -0.0032 C   0  0  0  0  0  0  0  0  0  0  0  0
    4.9943    5.1454   -3.3827 O   0  0  0  0  0  0  0  0  0  0  0  0
    5.4239    3.1531   -1.5074 C   0  0  0  0  0  0  0  0  0  0  0  0
    6.2068    2.9977    0.8099 N   0  0  0  0  0  0  0  0  0  0  0  0
    6.4726    2.7341   -0.4958 C   0  0  0  0  0  0  0  0  0  0  0  0
    4.1954    2.2710   -1.3838 C   0  0  0  0  0  0  0  0  0  0  0  0
    7.5069    2.2023   -0.8374 O   0  0  0  0  0  0  0  0  0  0  0  0
    6.3620   -3.2009    0.9790 C   0  0  0  0  0  0  0  0  0  0  0  0
    7.8008   -1.2279    1.5076 C   0  0  0  0  0  0  0  0  0  0  0  0
  1  2  1  0      
  2  3  2  0      
  3  4  1  0      
  4  5  2  0      
  5  6  1  0      
  6  1  2  0      
  7  8  1  0      
  8  9  1  0      
  9 10  1  0      
 10 11  1  0      
 11  7  1  0      
  4 11  1  0      
  7 12  2  0      
  8 13  1  0      
 10 14  1  0      
 10 15  1  0      
 15  5  1  0      
 15 16  1  0      
 16 17  1  0      
 17 18  1  0      
 17 19  1  0      
 19 20  1  0      
 20 21  1  0      
 21 22  1  0      
 22 23  2  0      
 23 24  1  0      
 24 19  2  0      
 22 25  1  0      
 25 26  2  0      
 26 27  1  0      
 27 28  2  0      
 28 23  1  0      
 21 29  2  0      
 20 30  1  0      
 17 31  1  0      
 30 32  1  0      
 15 33  1  0      
 30 33  1  0      
 32 34  2  0      
 32 31  1  0      
 13 35  1  0      
 13 36  1  0      
M  END
$$$$
