# Supplementary material for: Aniquinazolines A–D, Four New Quinazolinone Alkaloids from Marine-Derived Endophytic Fungus Aspergillus nidulans
Source: MDPI journal article supplement (doi:10.3390/md11072682), 2013-07-23
Supplement: s3 [file s3]

marinedrugs-11-02682-s001.mol
  ChemDraw01201408442D

 36 42  0  0  0  0  0  0  0  0999 V2000
   -1.1086    2.3722    0.0000 C   0  0  0  0  0  0  0  0  0  0  0  0
   -1.9336    2.3722    0.0000 C   0  0  0  0  0  0  0  0  0  0  0  0
   -2.3461    1.6577    0.0000 C   0  0  0  0  0  0  0  0  0  0  0  0
   -1.9336    0.9432    0.0000 C   0  0  0  0  0  0  0  0  0  0  0  0
   -1.1086    0.9432    0.0000 C   0  0  0  0  0  0  0  0  0  0  0  0
   -0.6961    1.6577    0.0000 C   0  0  0  0  0  0  0  0  0  0  0  0
   -2.9900   -0.2074    0.0000 C   0  0  0  0  0  0  0  0  0  0  0  0
   -2.7347   -0.9919    0.0000 C   0  0  0  0  0  0  0  0  0  0  0  0
   -1.9097   -0.9915    0.0000 N   0  0  0  0  0  0  0  0  0  0  0  0
   -1.6551   -0.2068    0.0000 C   0  0  0  0  0  0  0  0  0  0  0  0
   -2.3228    0.2778    0.0000 N   0  0  0  0  0  0  0  0  0  0  0  0
   -3.7045    0.2051    0.0000 O   0  0  0  0  0  0  0  0  0  0  0  0
   -3.3181   -1.5753    0.0000 C   0  0  0  0  0  0  0  0  0  0  0  0
   -1.4416    0.5901    0.0000 H   0  0  0  0  0  0  0  0  0  0  0  0
   -0.9407    0.2057    0.0000 C   0  0  0  0  0  0  0  0  0  0  0  0
   -0.2262    0.6182    0.0000 O   0  0  0  0  0  0  0  0  0  0  0  0
    0.5707    0.4047    0.0000 C   0  0  0  0  0  0  0  0  0  0  0  0
    0.5707    1.2297    0.0000 C   0  0  0  0  0  0  0  0  0  0  0  0
    1.2852   -0.0078    0.0000 C   0  0  0  0  0  0  0  0  0  0  0  0
    1.2852   -0.8328    0.0000 N   0  0  0  0  0  0  0  0  0  0  0  0
    1.9996   -1.2453    0.0000 C   0  0  0  0  0  0  0  0  0  0  0  0
    2.7141   -0.8328    0.0000 C   0  0  0  0  0  0  0  0  0  0  0  0
    2.7141   -0.0078    0.0000 C   0  0  0  0  0  0  0  0  0  0  0  0
    1.9996    0.4047    0.0000 N   0  0  0  0  0  0  0  0  0  0  0  0
    3.4286   -1.2453    0.0000 C   0  0  0  0  0  0  0  0  0  0  0  0
    4.1431   -0.8328    0.0000 C   0  0  0  0  0  0  0  0  0  0  0  0
    4.1431   -0.0078    0.0000 C   0  0  0  0  0  0  0  0  0  0  0  0
    3.4286    0.4047    0.0000 C   0  0  0  0  0  0  0  0  0  0  0  0
    1.9996   -2.0703    0.0000 O   0  0  0  0  0  0  0  0  0  0  0  0
    0.5707   -1.2453    0.0000 C   0  0  0  0  0  0  0  0  0  0  0  0
    0.0670   -0.0954    0.0000 N   0  0  0  0  0  0  0  0  0  0  0  0
    0.3145   -1.5598    0.0000 C   0  0  0  0  0  0  0  0  0  0  0  0
   -0.7271   -0.5912    0.0000 C   0  0  0  0  0  0  0  0  0  0  0  0
    0.1010   -2.3567    0.0000 O   0  0  0  0  0  0  0  0  0  0  0  0
   -4.1431   -1.5753    0.0000 C   0  0  0  0  0  0  0  0  0  0  0  0
   -3.1045   -2.3722    0.0000 C   0  0  0  0  0  0  0  0  0  0  0  0
  1  2  1  0      
  2  3  2  0      
  3  4  1  0      
  4  5  2  0      
  5  6  1  0      
  6  1  2  0      
  7  8  1  0      
  8  9  1  0      
  9 10  1  0      
 10 11  1  0      
 11  7  1  0      
  4 11  1  0      
  7 12  2  0      
  8 13  1  1      
 10 14  1  1      
 10 15  1  0      
 15  5  1  6      
 15 16  1  1      
 16 17  1  0      
 17 18  1  1      
 17 19  1  0      
 19 20  1  0      
 20 21  1  0      
 21 22  1  0      
 22 23  2  0      
 23 24  1  0      
 24 19  2  0      
 22 25  1  0      
 25 26  2  0      
 26 27  1  0      
 27 28  2  0      
 28 23  1  0      
 21 29  2  0      
 20 30  1  0      
 17 31  1  0      
 30 32  1  1      
 15 33  1  0      
 30 33  1  6      
 32 34  2  0      
 32 31  1  0      
 13 35  1  0      
 13 36  1  0      
M  END
