# Supplementary material for: Aniquinazolines A–D, Four New Quinazolinone Alkaloids from Marine-Derived Endophytic Fungus Aspergillus nidulans
Source: MDPI journal article supplement (doi:10.3390/md11072682), 2013-07-23
Supplement: s4 [file s4]

marinedrugs-11-02682-s002.mol
  corina  04141406483D 1   1.00000     0.00000 
CORINA 3.49 0023  12.04.2013
 37 42  0  0  0  0  0  0  0  0999 V2000
    0.0472    2.1846    1.3035 C   0  0  0  0  0  0  0  0  0  0  0  0
   -0.2175    0.8274    1.2747 C   0  0  0  0  0  0  0  0  0  0  0  0
    0.7719   -0.0661    0.9182 C   0  0  0  0  0  0  0  0  0  0  0  0
    2.0418    0.3953    0.5866 C   0  0  0  0  0  0  0  0  0  0  0  0
    2.3134    1.7574    0.6681 C   0  0  0  0  0  0  0  0  0  0  0  0
    1.3145    2.6479    0.9991 C   0  0  0  0  0  0  0  0  0  0  0  0
    3.5805   -1.3294   -0.6507 C   0  0  0  0  0  0  0  0  0  0  0  0
    5.0516   -1.1413   -0.9600 C   0  0  0  0  0  0  0  0  0  0  0  0
    5.3403    0.2678   -0.5854 N   0  0  0  0  0  0  0  0  0  0  0  0
    4.3434    0.5203    0.4696 C   0  0  0  0  0  0  0  0  0  0  0  0
    3.1628   -0.2858    0.0903 N   0  0  0  0  0  0  0  0  0  0  0  0
    2.8944   -2.2626   -1.0105 O   0  0  0  0  0  0  0  0  0  0  0  0
    5.8992   -2.1000   -0.1213 C   0  0  0  0  0  0  0  0  0  0  0  0
    4.7212    0.2550    1.4570 H   0  0  0  0  0  0  0  0  0  0  0  0
    3.7960    1.9569    0.4096 C   0  0  0  0  0  0  0  0  0  0  0  0
    4.3841    2.7667    1.4295 O   0  0  0  0  0  0  0  0  0  0  0  0
    5.2937    4.9490   -2.6541 C   0  0  0  0  0  0  0  0  0  0  0  0
    5.8691    5.6583   -3.2490 H   0  0  0  0  0  0  0  0  0  0  0  0
    5.0574    5.5173   -1.2700 C   0  0  0  0  0  0  0  0  0  0  0  0
    4.0518    4.9787   -0.5194 N   0  0  0  0  0  0  0  0  0  0  0  0
    3.7881    5.4380    0.7219 C   0  0  0  0  0  0  0  0  0  0  0  0
    4.6221    6.5383    1.2288 C   0  0  0  0  0  0  0  0  0  0  0  0
    5.6408    7.0365    0.3868 C   0  0  0  0  0  0  0  0  0  0  0  0
    5.8075    6.4883   -0.8419 N   0  0  0  0  0  0  0  0  0  0  0  0
    4.4307    7.0868    2.4949 C   0  0  0  0  0  0  0  0  0  0  0  0
    5.2422    8.1167    2.9179 C   0  0  0  0  0  0  0  0  0  0  0  0
    6.2451    8.6094    2.0932 C   0  0  0  0  0  0  0  0  0  0  0  0
    6.4507    8.0808    0.8389 C   0  0  0  0  0  0  0  0  0  0  0  0
    2.8941    4.9602    1.3960 O   0  0  0  0  0  0  0  0  0  0  0  0
    3.2536    3.8836   -1.0857 C   0  0  0  0  0  0  0  0  0  0  0  0
    3.9882    4.7158   -3.2877 N   0  0  0  0  0  0  0  0  0  0  0  0
    2.9860    4.1947   -2.5413 C   0  0  0  0  0  0  0  0  0  0  0  0
    4.0283    2.5690   -0.9732 C   0  0  0  0  0  0  0  0  0  0  0  0
    1.8965    3.9818   -3.0298 O   0  0  0  0  0  0  0  0  0  0  0  0
    5.5286   -3.5437   -0.4666 C   0  0  0  0  0  0  0  0  0  0  0  0
    7.3810   -1.8677   -0.4231 C   0  0  0  0  0  0  0  0  0  0  0  0
    6.0580    3.6281   -2.5454 C   0  0  0  0  0  0  0  0  0  0  0  0
  1  2  1  0      
  2  3  2  0      
  3  4  1  0      
  4  5  2  0      
  5  6  1  0      
  6  1  2  0      
  7  8  1  0      
  8  9  1  0      
  9 10  1  0      
 10 11  1  0      
 11  7  1  0      
  4 11  1  0      
  7 12  2  0      
  8 13  1  0      
 10 14  1  0      
 10 15  1  0      
 15  5  1  0      
 15 16  1  0      
 17 18  1  0      
 17 19  1  0      
 19 20  1  0      
 20 21  1  0      
 21 22  1  0      
 22 23  2  0      
 23 24  1  0      
 24 19  2  0      
 22 25  1  0      
 25 26  2  0      
 26 27  1  0      
 27 28  2  0      
 28 23  1  0      
 21 29  2  0      
 20 30  1  0      
 17 31  1  0      
 30 32  1  0      
 15 33  1  0      
 30 33  1  0      
 32 34  2  0      
 32 31  1  0      
 13 35  1  0      
 13 36  1  0      
 17 37  1  0      
M  END
$$$$
