# Supplementary material for: Aniquinazolines A–D, Four New Quinazolinone Alkaloids from Marine-Derived Endophytic Fungus Aspergillus nidulans
Source: MDPI journal article supplement (doi:10.3390/md11072682), 2013-07-23
Supplement: s6 [file s6]

marinedrugs-11-02682-s003.mol
  corina  04141406483D 1   1.00000     0.00000 
CORINA 3.49 0023  12.04.2013
 33 38  0  0  0  0  0  0  0  0999 V2000
    0.6319    1.6707   -1.2593 C   0  0  0  0  0  0  0  0  0  0  0  0
    0.5679    0.2925   -1.2314 C   0  0  0  0  0  0  0  0  0  0  0  0
    1.6871   -0.4869   -0.9840 C   0  0  0  0  0  0  0  0  0  0  0  0
    2.8930    0.1796   -0.7630 C   0  0  0  0  0  0  0  0  0  0  0  0
    2.9561    1.5768   -0.8384 C   0  0  0  0  0  0  0  0  0  0  0  0
    1.8308    2.3457   -1.0632 C   0  0  0  0  0  0  0  0  0  0  0  0
    4.7572   -1.3653    0.2414 C   0  0  0  0  0  0  0  0  0  0  0  0
    6.1912   -0.9259    0.5143 C   0  0  0  0  0  0  0  0  0  0  0  0
    6.1252    0.5365    0.3491 N   0  0  0  0  0  0  0  0  0  0  0  0
    5.1509    0.6610   -0.7464 C   0  0  0  0  0  0  0  0  0  0  0  0
    4.1220   -0.3474   -0.3858 N   0  0  0  0  0  0  0  0  0  0  0  0
    4.2714   -2.4374    0.5341 O   0  0  0  0  0  0  0  0  0  0  0  0
    6.6073   -1.2913    1.9405 C   0  0  0  0  0  0  0  0  0  0  0  0
    5.6018    0.4607   -1.7184 H   0  0  0  0  0  0  0  0  0  0  0  0
    4.3950    1.9949   -0.7065 C   0  0  0  0  0  0  0  0  0  0  0  0
    4.7770    2.8152   -1.8125 O   0  0  0  0  0  0  0  0  0  0  0  0
    5.6051   -0.6971    2.9322 C   0  0  0  0  0  0  0  0  0  0  0  0
    6.6315   -2.8138    2.0905 C   0  0  0  0  0  0  0  0  0  0  0  0
    6.7415    1.5269    0.9955 C   0  0  0  0  0  0  0  0  0  0  0  0
    4.6283    2.7222    0.6126 C   0  0  0  0  0  0  0  0  0  0  0  0
    6.1327    2.9110    0.8513 C   0  0  0  0  0  0  0  0  0  0  0  0
    7.7352    1.3327    1.6632 O   0  0  0  0  0  0  0  0  0  0  0  0
    6.3503    3.6820    2.0779 N   0  0  0  0  0  0  0  0  0  0  0  0
    5.8899    3.2047    3.2635 C   0  0  0  0  0  0  0  0  0  0  0  0
    7.0130    4.8607    2.0202 C   0  0  0  0  0  0  0  0  0  0  0  0
    7.2032    5.5927    3.2813 C   0  0  0  0  0  0  0  0  0  0  0  0
    6.6846    5.0211    4.4643 C   0  0  0  0  0  0  0  0  0  0  0  0
    6.0426    3.8283    4.3921 N   0  0  0  0  0  0  0  0  0  0  0  0
    7.8718    6.8141    3.3310 C   0  0  0  0  0  0  0  0  0  0  0  0
    8.0219    7.4570    4.5402 C   0  0  0  0  0  0  0  0  0  0  0  0
    7.5132    6.8979    5.7054 C   0  0  0  0  0  0  0  0  0  0  0  0
    6.8496    5.6921    5.6778 C   0  0  0  0  0  0  0  0  0  0  0  0
    7.4356    5.2977    0.9656 O   0  0  0  0  0  0  0  0  0  0  0  0
  1  2  1  0      
  2  3  2  0      
  3  4  1  0      
  4  5  2  0      
  5  6  1  0      
  6  1  2  0      
  7  8  1  0      
  8  9  1  0      
  9 10  1  0      
 10 11  1  0      
 11  7  1  0      
  4 11  1  0      
  7 12  2  0      
  8 13  1  0      
 10 15  1  0      
 13 17  1  0      
 13 18  1  0      
  5 15  1  0      
 10 14  1  0      
 15 16  1  0      
  9 19  1  0      
 15 20  1  0      
 20 21  1  0      
 19 21  1  0      
 19 22  2  0      
 21 23  1  0      
 23 24  1  0      
 23 25  1  0      
 25 26  1  0      
 26 27  2  0      
 27 28  1  0      
 28 24  2  0      
 26 29  1  0      
 29 30  2  0      
 30 31  1  0      
 31 32  2  0      
 32 27  1  0      
 25 33  2  0      
M  END
$$$$
