# Supplementary material for: Aniquinazolines A–D, Four New Quinazolinone Alkaloids from Marine-Derived Endophytic Fungus Aspergillus nidulans
Source: MDPI journal article supplement (doi:10.3390/md11072682), 2013-07-23
Supplement: s7 [file s7]

marinedrugs-11-02682-s003.mol
  ChemDraw01201408442D

 33 38  0  0  0  0  0  0  0  0999 V2000
   -0.8545    2.4094    0.0000 C   0  0  0  0  0  0  0  0  0  0  0  0
   -1.6795    2.4094    0.0000 C   0  0  0  0  0  0  0  0  0  0  0  0
   -2.0920    1.6950    0.0000 C   0  0  0  0  0  0  0  0  0  0  0  0
   -1.6795    0.9805    0.0000 C   0  0  0  0  0  0  0  0  0  0  0  0
   -0.8545    0.9805    0.0000 C   0  0  0  0  0  0  0  0  0  0  0  0
   -0.4420    1.6950    0.0000 C   0  0  0  0  0  0  0  0  0  0  0  0
   -2.6328   -0.1908    0.0000 C   0  0  0  0  0  0  0  0  0  0  0  0
   -2.3775   -0.9753    0.0000 C   0  0  0  0  0  0  0  0  0  0  0  0
   -1.5525   -0.9749    0.0000 N   0  0  0  0  0  0  0  0  0  0  0  0
   -1.2979   -0.1901    0.0000 C   0  0  0  0  0  0  0  0  0  0  0  0
   -1.9656    0.2945    0.0000 N   0  0  0  0  0  0  0  0  0  0  0  0
   -3.3472    0.2217    0.0000 O   0  0  0  0  0  0  0  0  0  0  0  0
   -2.9608   -1.5586    0.0000 C   0  0  0  0  0  0  0  0  0  0  0  0
   -1.0844    0.6067    0.0000 H   0  0  0  0  0  0  0  0  0  0  0  0
   -0.5834    0.2224    0.0000 C   0  0  0  0  0  0  0  0  0  0  0  0
    0.1311    0.6349    0.0000 O   0  0  0  0  0  0  0  0  0  0  0  0
   -3.7858   -1.5586    0.0000 C   0  0  0  0  0  0  0  0  0  0  0  0
   -2.7473   -2.3555    0.0000 C   0  0  0  0  0  0  0  0  0  0  0  0
   -0.6483   -1.5844    0.0000 C   0  0  0  0  0  0  0  0  0  0  0  0
    0.1311   -0.1901    0.0000 C   0  0  0  0  0  0  0  0  0  0  0  0
    0.1311   -1.0151    0.0000 C   0  0  0  0  0  0  0  0  0  0  0  0
   -0.6483   -2.4094    0.0000 O   0  0  0  0  0  0  0  0  0  0  0  0
    0.9279   -0.8016    0.0000 N   0  0  0  0  0  0  0  0  0  0  0  0
    0.9279    0.0234    0.0000 C   0  0  0  0  0  0  0  0  0  0  0  0
    1.6424   -1.2141    0.0000 C   0  0  0  0  0  0  0  0  0  0  0  0
    2.3569   -0.8016    0.0000 C   0  0  0  0  0  0  0  0  0  0  0  0
    2.3569    0.0234    0.0000 C   0  0  0  0  0  0  0  0  0  0  0  0
    1.6424    0.4359    0.0000 N   0  0  0  0  0  0  0  0  0  0  0  0
    3.0714   -1.2141    0.0000 C   0  0  0  0  0  0  0  0  0  0  0  0
    3.7858   -0.8016    0.0000 C   0  0  0  0  0  0  0  0  0  0  0  0
    3.7858    0.0234    0.0000 C   0  0  0  0  0  0  0  0  0  0  0  0
    3.0714    0.4359    0.0000 C   0  0  0  0  0  0  0  0  0  0  0  0
    1.6424   -2.0391    0.0000 O   0  0  0  0  0  0  0  0  0  0  0  0
  1  2  1  0      
  2  3  2  0      
  3  4  1  0      
  4  5  2  0      
  5  6  1  0      
  6  1  2  0      
  7  8  1  0      
  8  9  1  0      
  9 10  1  0      
 10 11  1  0      
 11  7  1  0      
  4 11  1  0      
  7 12  2  0      
  8 13  1  1      
 10 15  1  0      
 13 17  1  0      
 13 18  1  0      
  5 15  1  0      
 10 14  1  6      
 15 16  1  6      
  9 19  1  0      
 15 20  1  0      
 20 21  1  0      
 19 21  1  0      
 19 22  2  0      
 21 23  1  1      
 23 24  1  0      
 23 25  1  0      
 25 26  1  0      
 26 27  2  0      
 27 28  1  0      
 28 24  2  0      
 26 29  1  0      
 29 30  2  0      
 30 31  1  0      
 31 32  2  0      
 32 27  1  0      
 25 33  2  0      
M  END
